# Supplementary material for: A Cr2O3/MWCNTs composite as a superior electrode material for supercapacitor
Source: Royal Society of Chemistry journal article supplement (doi:10.1039/c7ra01954h), 2017-01-01
Supplement: c7ra01954h1.pdf [file c7ra01954h1.pdf]

### A $\text{Cr}_2\text{O}_3/\text{MWCNTs}$ composite as a superior electrode material for supercapacitor

Bingwei Chen<sup>a,b</sup>, Yanfang Wang<sup>b</sup>, Chunyang Li<sup>a</sup>, Lijun Fu<sup>a</sup>, Xiang Liu<sup>a</sup>, Yusong Zhu<sup>a,\*</sup>, Lixin Zhang<sup>b,\*</sup>, Yuping Wu<sup>a,b,\*</sup>

<sup>a</sup> School of Energy Science and Engineering & Institute for Electrochemical Energy Storage, Nanjing Tech University, Nanjing 211816, Jiangsu Province, China

<sup>b</sup> New Energy and Material Laboratory (NEML), Department of Chemistry & Shanghai Key Laboratory of Molecular Catalysis and Innovative Material, Fudan University, Shanghai 200433, China

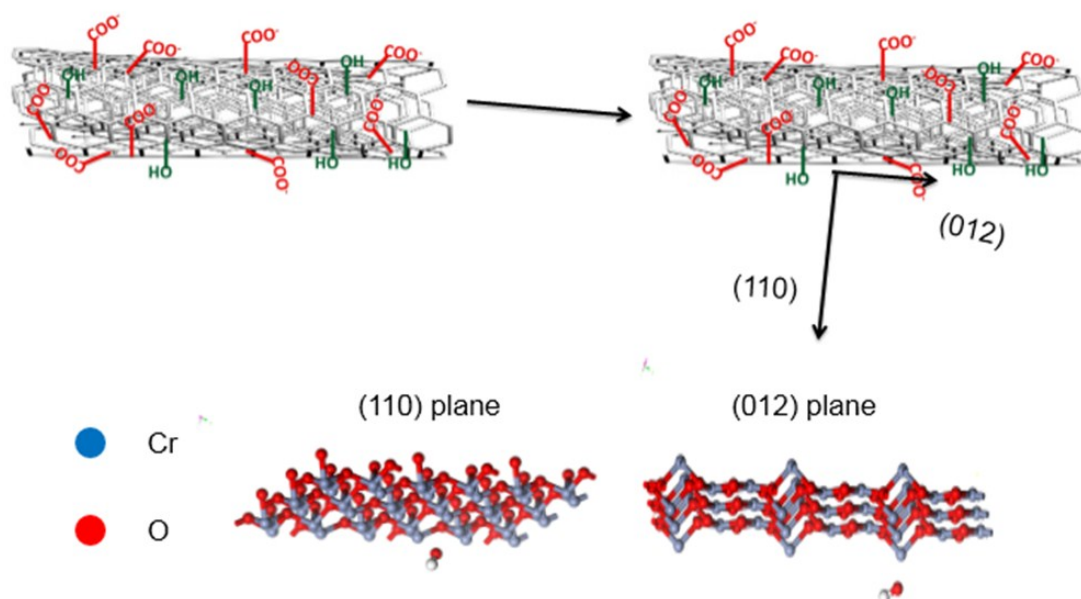

Figure S1 Crystal planes of (110) and (012).
